# Supplementary material for: Effective Treatment of SSTR2-Positive Small Cell Lung Cancer Using 211At-Containing Targeted α-Particle Therapy Agent Which Promotes Endogenous Antitumor Immune Response
Source: PubMed Central journal article supplement — Mol Pharm. 2023 Oct 3;20(11):5543–53. doi: 10.1021/acs.molpharmaceut.3c00427 (PMC10630944; doi:10.1021/acs.molpharmaceut.3c00427), 2023-10-03
Supplement: mp3c00427_si_001.pdf [file mp3c00427_si_001.pdf]

## *Supporting Information*

# **Effective treatment of SSTR2 positive small cell lung cancer using $^{211}\text{At}$ -containing targeted $\alpha$ -particle therapy agent which promotes endogenous anti-tumor immune response**

**Shanshan Qin<sup>1,2,†</sup>, Yuanyou Yang<sup>3,†</sup>, Jiajia Zhang<sup>1,2</sup>, Yuzhen Yin<sup>1,2</sup>, Weihao Liu<sup>3</sup>, Han Zhang<sup>1,2</sup>, Xin Fan<sup>1,2</sup>, Mengdie Yang<sup>1,2</sup>, Fei Yu<sup>1,2,\*</sup>**

<sup>1</sup>Department of Nuclear Medicine, Shanghai Tenth People's Hospital, Tongji University School of Medicine, No. 301 Yan-chang-zhong Road, Shanghai 200072, People's Republic of China

<sup>2</sup>Institute of Nuclear Medicine, Tongji University School of Medicine, No. 301 Yan-chang-zhong Road, Shanghai 200072, People's Republic of China

<sup>3</sup>Key Laboratory of Radiation Physics and Technology, Ministry of Education, Institute of Nuclear Science and Technology, Sichuan University, Chengdu 610064, People's Republic of China

\*Correspondence: yufei\_021@163.com

†These authors contributed equally to the work.

### **Corresponding Author**

Fei Yu - Department of Nuclear Medicine, Shanghai Tenth People's Hospital, Tongji University School of Medicine, No. 301 Yan-chang-zhong Road, Shanghai 200072, People's Republic of China;

Email: yufei\_021@163.com

## Contents

**Figure S1.** HPLC chromatograms of a mixture of octreotide, m-MeATE and Oct-m-MeATE conjugate.

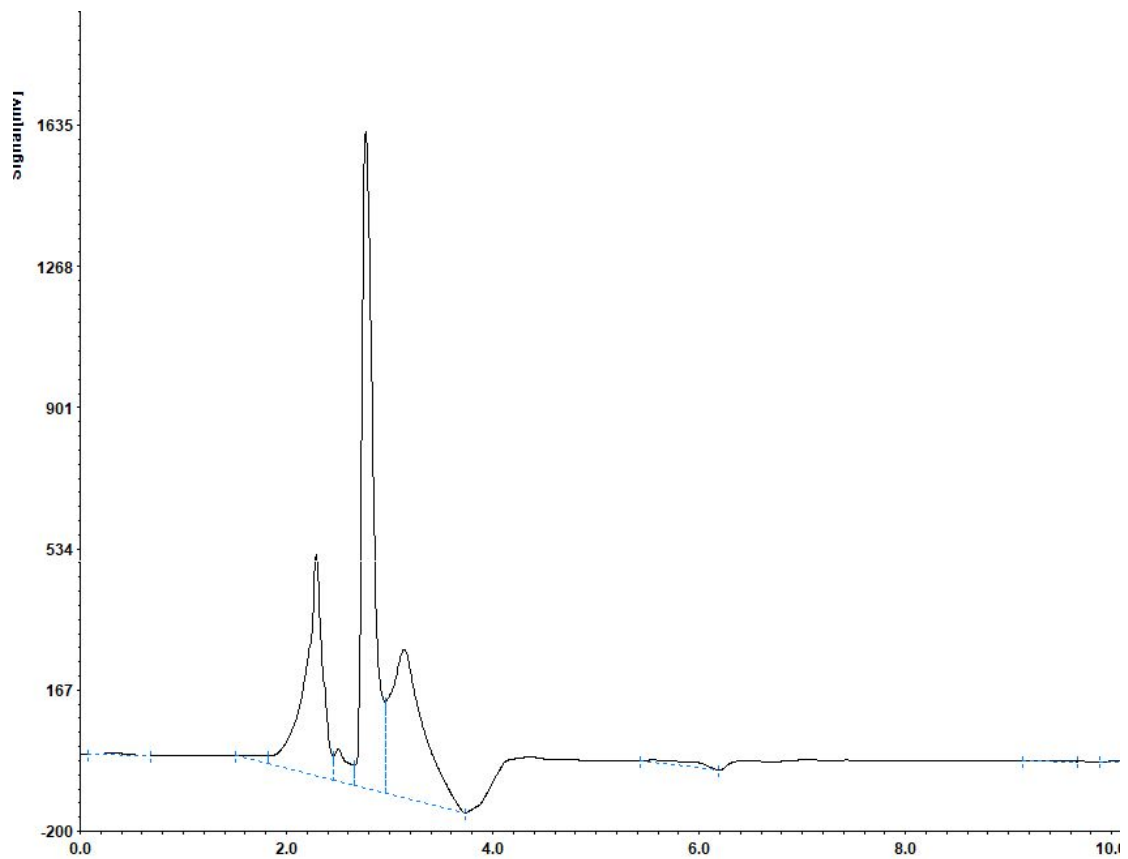

**Figure S1.** HPLC chromatograms. The peaks of octreotide, m-MeATE and Oct-m-MeATE conjugate correspond to 2.28min, 2.76min and 3.13min, respectively.
